# Supplementary material for: Host microRNAs are differentially expressed in EBV+ Post-transplant Lymphoproliferative Disorder solid-organ transplant recipients
Source: bioRxiv or medRxiv preprint supplement (doi:10.1101/2022.06.20.22276573), 2022-06-21
Supplement: Supplementary file [file media-1.pdf]

Supplemental Document:

**Figure S1:**

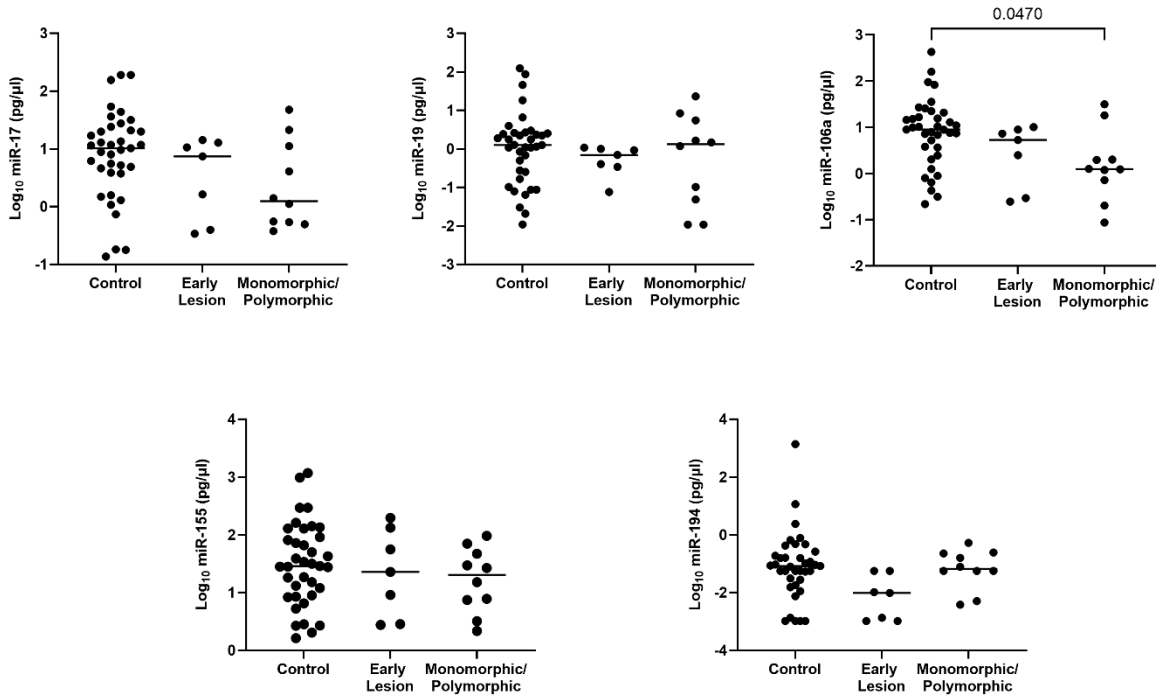

**Figure S1: Decreased levels of miRs are detected in the plasma of PTLD+ pediatric transplant recipients with monomorphic or polymorphic lesions as compared to controls.** Concentrations of miR-17, miR-19, miR-106a, miR-155 and miR-194 were measured by qPCR in plasma of PTLD+ patients with early lesions, monomorphic/polymorphic lesions and matched controls. miR-106a, controls vs monomorphic/polymorphic lesions,  $p = 0.047$  by one-way ANOVA.

**Figure S2:**

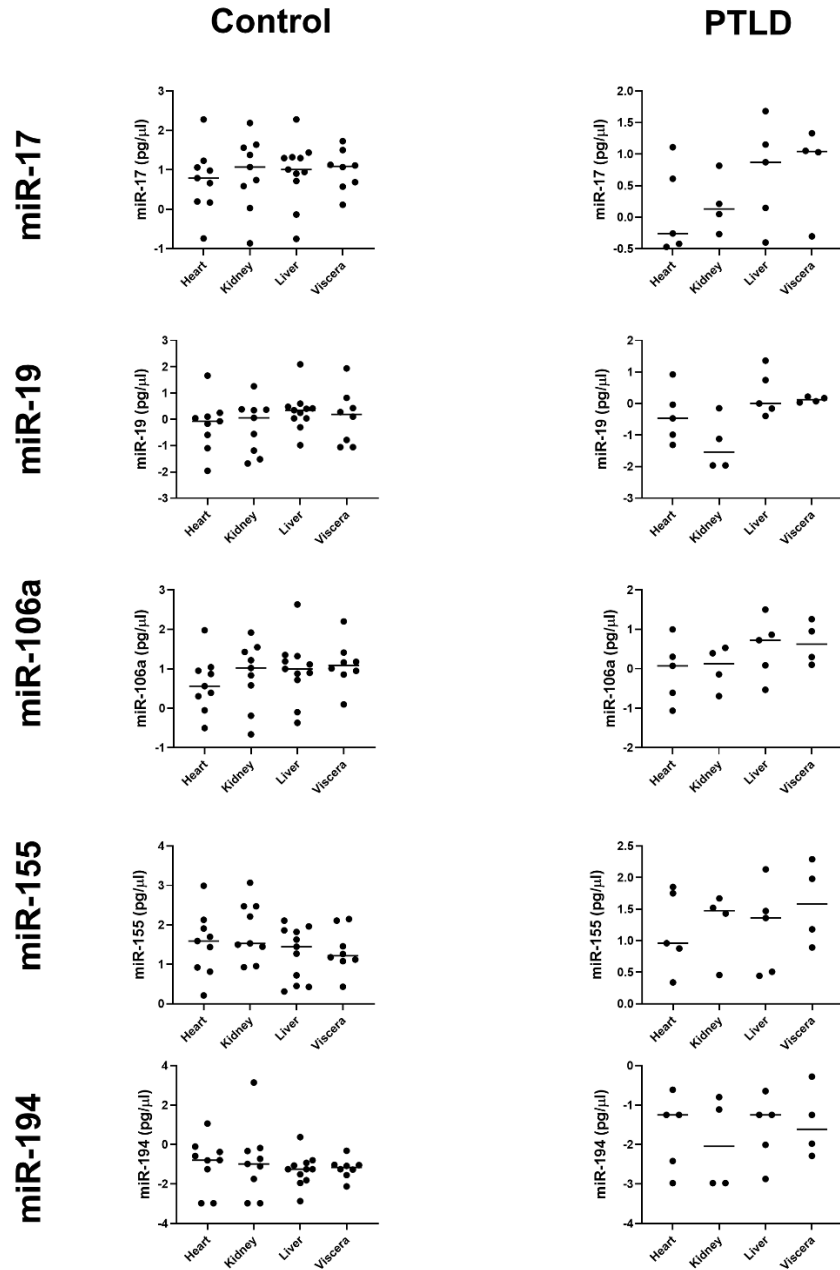

**Figure S2: The expression of miRs 17, 19, 106a, 155 and 194 did not differ significantly between the recipients of heart, kidney, liver and visceral transplants within PTLD+ and control groups. Concentrations of miR-17, miR-19, miR-106a, miR-155 and miR-194 were measured by qPCR in plasma of recipients of heart, kidney, liver and visceral transplant.**

**Figure S3:**

**A.**

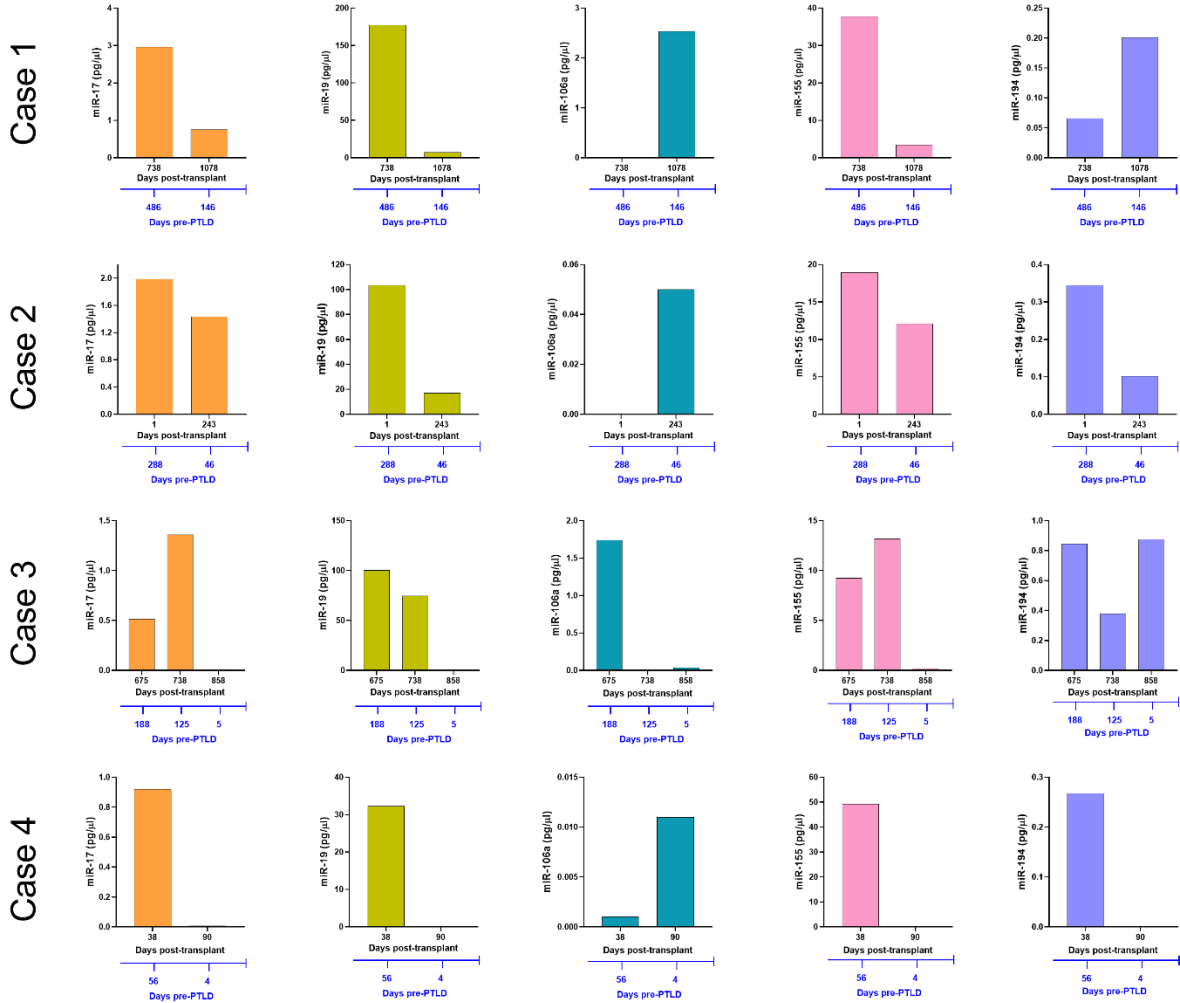

### Case 5

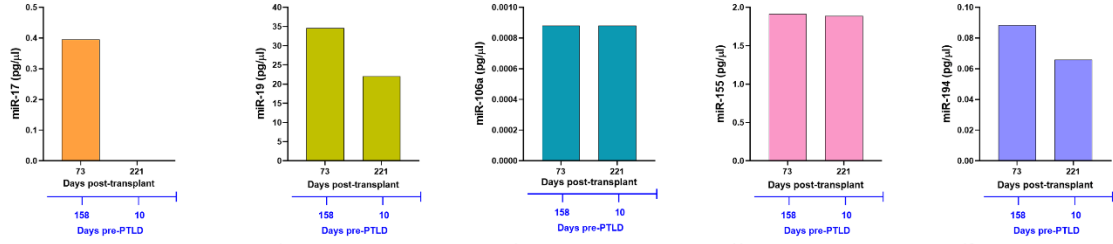

### Case 6

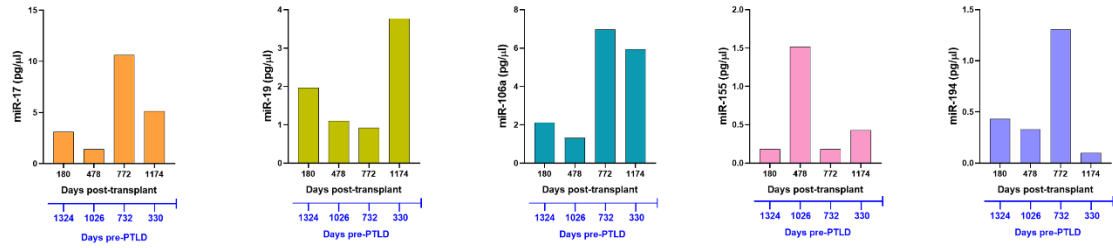

### Case 7

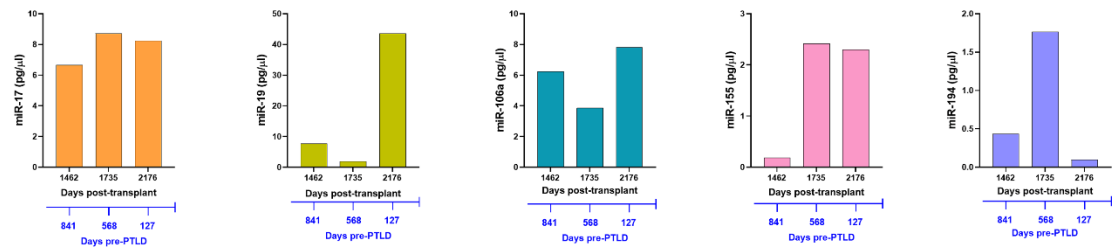

### Case 8

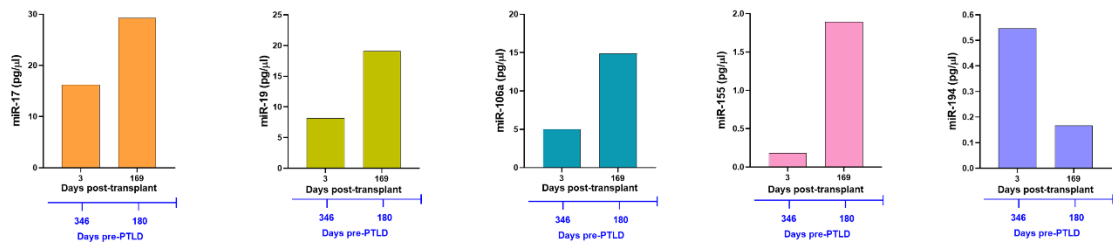

B.

Control 1

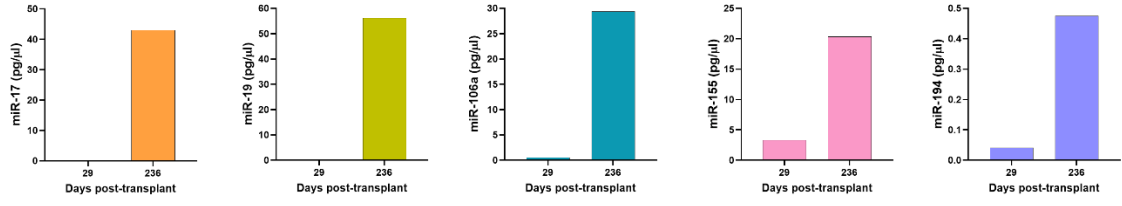

Control 2

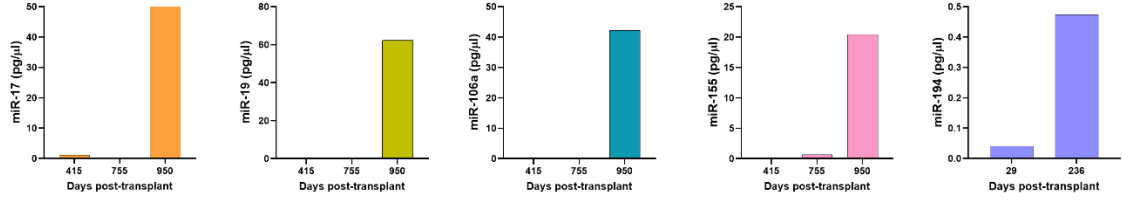

Control 3

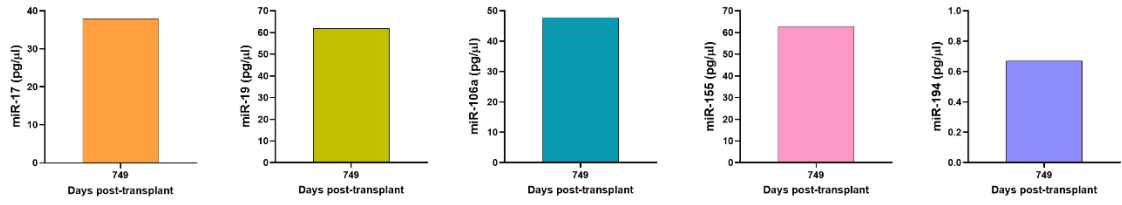

Control 4

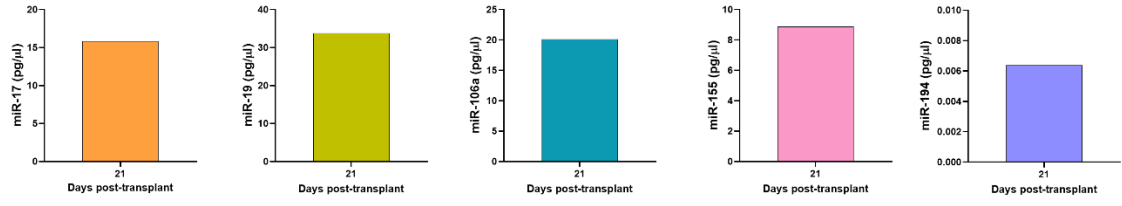

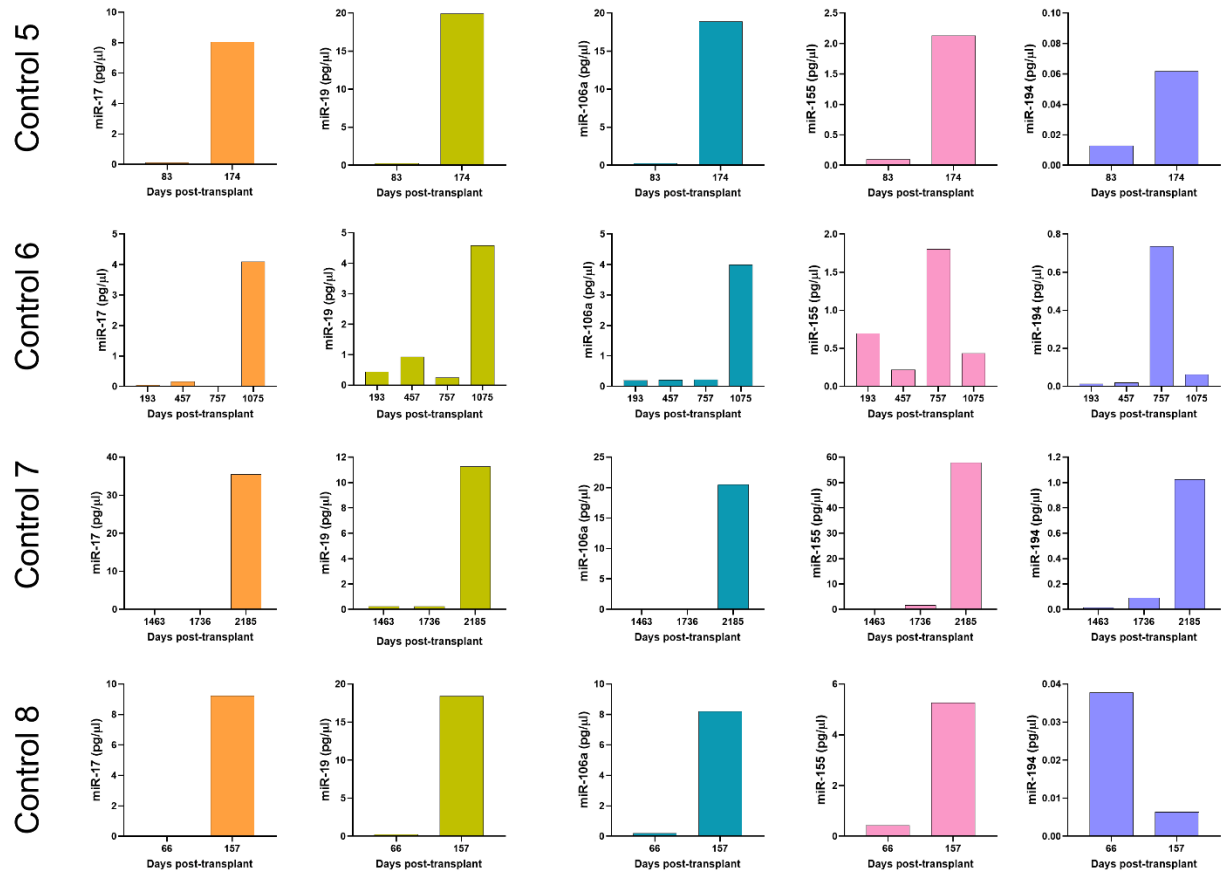

**Figure S3: Longitudinal analysis of plasma miRNA expression. (A)** Concentrations of miR-17, miR-19, miR-106a, miR-155 and miR-194 were measured by qPCR in plasma samples collected at multiple timepoints post-transplant from PTLD+ patients (n = 8). **(B)** Concentrations of miR-17, miR-19, miR-106a, miR-155 and miR-194 were measured by qPCR in plasma samples collected post-transplant from control patients at timepoints matched with paired PTLD+ patients (n = 8).

**Figure S4:**

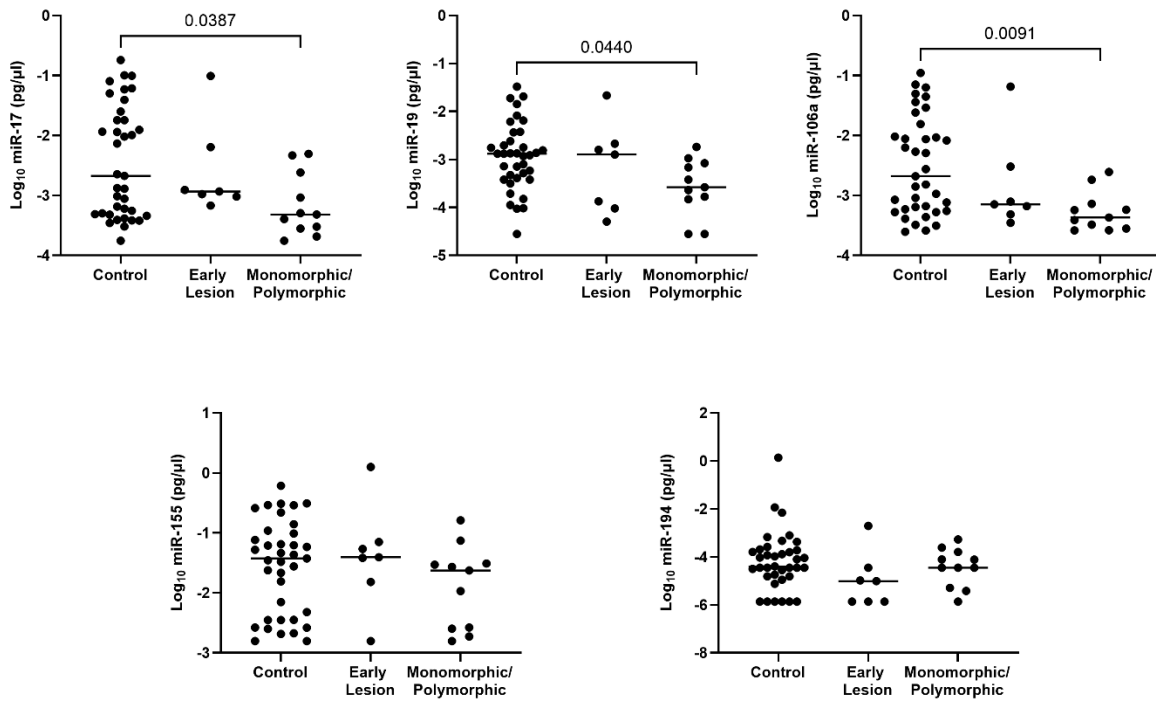

**Figure S4: Decreased levels of miRs are detected in the EV of PTLD+ pediatric transplant recipients with monomorphic or polymorphic lesions as compared to controls.** Concentrations of miR-17, miR-19, miR-106a, miR-155 and miR-194 were measured by qPCR in plasma of PTLD+ patients with early lesions, monomorphic/polymorphic lesions and matched controls. miR-17, controls vs monomorphic/polymorphic lesions,  $p = 0.039$ ; miR-19, controls vs monomorphic/polymorphic lesions,  $p = 0.044$ ; miR-106a, controls vs monomorphic/polymorphic lesions,  $p = 0.009$ , by one-way ANOVA.
